1           **A Research on the Results of Viral Nucleic Acid Tests and CT**

2                           **Imaging Variation of Patients with COVID-19**

3           Meng Xu<sup>2\*</sup>, Xun Liu<sup>3\*</sup>, Chuhong Su<sup>4\*</sup>, Yuping Zeng<sup>5</sup>, Jinqian Zhang<sup>6</sup>, Xuwen Li<sup>2</sup>,

4                           Guirong Liu<sup>7</sup>, Jinjun Xie<sup>8</sup>, Hongyong Liu<sup>9</sup>, Yusheng Jie<sup>1</sup>

5           <sup>1</sup>Department of Infectious Diseases, the Third Affiliated Hospital of Sun Yat-sen University,

6           Guangzhou, P.R. China;

7           <sup>2</sup>Department of Hospital Infection Management, the Third Affiliated Hospital of Sun Yat-sen

8           University Yuedong Hospital, Meizhou, P. R. China;

9           <sup>3</sup>Clinial data center, the Third Affiliated Hospital of Sun Yat-sen University, Guangzhou, P. R.

10          China;

11          <sup>4</sup>Department of Nutrition and Food Hygiene, Southern Medical University, Guangzhou, P. R.

12          China;

13          <sup>5</sup>Department of Intensive Medical, the Third Affiliated Hospital of Sun Yat-sen University

14          Yuedong Hospital, Meizhou, P. R. China;

15          <sup>6</sup>Department of Cardiovascular Medicine, the Third Affiliated Hospital of Sun Yat-sen University

16          Yuedong Hospital, Meizhou, P. R. China;

17          <sup>7</sup>Department of Laboratory Medicine, The Third Affiliated Hospital of Sun Yat-sen University

18          Yuedong Hospital, Meizhou, P. R. China;

19          <sup>8</sup>Department of Radiology, The Third Affiliated Hospital of Sun Yat-sen University Yuedong

20          Hospital, Meizhou, P. R. China;

21          <sup>9</sup>Department of Renal Medicine, the Third Affiliated Hospital of Sun Yat-sen University Yuedong

22          Hospital, Meizhou, P. R. China;

23 \*Equal contribution

24 Correspondence to: Hongyong Liu, email:13823850589@139.com. And Yusheng Jie, M.D, Ph.D,

25 email: [jjeyusheng@163.com](mailto:jjeyusheng@163.com)

26

27

28

29

30

31

32

33

34

35

36

37

38

39

40

41

42

43

44

45 **Abbreviations**

46

47 COVID-19:coronavirus disease 2019

48 WHO: The World Health Organization

49 SARS-CoV-2: severe acute respiratory syndrome coronavirus 2

50 RT-PCR: real-time reverse transcription–polymerase chain reaction

51 CT: computerized tomography

52 GGO: ground-glass opacity

53 ACE2: angiotensin-converting enzyme 2

54

55

56

57

58

59

60

61

62

63

64

65

66

67 **Abstract**

68 **Background:** Coronavirus disease 2019 (COVID-19) has become a global health  
69 problem. We aim to investigate the changes in the results of viral nucleic acid tests on  
70 pharyngeal swabs and feces of patients with COVID-19 and CT imaging of lungs as  
71 the disease progresses.

72 **Methods:** Seven patients with COVID-19 in the third affiliated hospital of Sun  
73 Yat-sen University Yuedong Hospital were retrospectively enrolled with clinical  
74 features, including imaging staging, and performance characteristics of viral nucleic  
75 acid test results of pharyngeal swabs and feces. The dynamic changes of these  
76 features were observed during hospitalization, and therapeutic effect and prognosis of  
77 patients were evaluated.

78 **Results:** The results of seven cases with COVID-19 were positive for viral nucleic  
79 acid tests on pharyngeal swabs early after the onset of symptoms, and then turned  
80 negative; while the results of viral nucleic acid tests on feces were persistently  
81 positive in the mid-term clinical treatment and recovery period. And the viral nucleic  
82 acid test results were capricious in three cases. Pulmonary CT imaging showed  
83 characteristic changes in early, advanced and recovery phases.

84 **Conclusion:** The application of viral nucleic acid detection and pulmonary CT  
85 imaging can be used for screening of suspected cases. Fecal nucleic acid test should  
86 be recommended as the reference of discharge standard, in order to minimize  
87 the risk of transmission from digestive tract.

88

89 **Key Words:**

90 COVID-19; Diagnosis; Virus Nucleic Acid; Lung CT

91

92

93

## 94 **1. Introduction**

95 Beginning in December 2019, a cluster of unidentified respiratory illness was  
96 successively discovered in Wuhan, China, and subsequently spread in various  
97 provinces of China and over 90 countries worldwide. The World Health Organization  
98 (WHO) named this kind of unidentified disease as COVID-19. Recent researches  
99 show that severe acute respiratory syndrome coronavirus 2 (SARS-CoV-2), a  $\beta$ -type  
100 coronavirus, has more than 85% homology with bat SARS-like coronavirus, acting as  
101 the causative organism of COVID-19, and it is easily transmissible in humans. The  
102 source of infection is mainly infected patients, and also asymptomatic patients.  
103 Respiratory droplets and close contact transmission are definite transmission routes  
104 and there is a possibility of aerosol transmission in a relatively closed environment  
105 when exposed to high concentrations of aerosol for a long time. Primary  
106 manifestations of COVID-19 include fever, dry cough, limb weakness and dyspnea[1].  
107 The latest research found that COVID-19 cases may also show gastrointestinal  
108 symptoms, but the incidence is low[2]. Similarly, clinical manifestation of cases in  
109 our hospital also include gastrointestinal symptoms. By March 5, 2020, on the verge  
110 of reaching 100000 confirmed cases of COVID-19 had been reported in China and  
111 other countries around the world [3], and 1524 patients had died, equivalent to a  
112 mortality rate of about 2%[4].

113 In addition to the corresponding epidemiological history and clinical  
114 manifestations, confirmed cases of COVID-19 need to have etiological evidence,  
115 which means positive real-time reverse-transcription–polymerase-chain-reaction  
116 (RT-PCR) results for the detection of SARS-CoV-2 nucleic acids or highly  
117 homologous viral gene sequencing to known SARS-CoV-2[5]. Compared with viral  
118 gene sequencing, viral nucleic acid detection is more cost-effective, efficient, and  
119 faster, making it the main method for pathogenic diagnosis. Due to the lack of nucleic  
120 acid detection kit and its long detection time span characteristics, viral nucleic acid  
121 detection for large number of patients in the early stages of outbreak becomes difficult.

122 Some clinicians proposed that the pulmonary computerized tomography (CT) scan of  
123 the lungs should be included in the diagnostic criteria, and even discussed whether it  
124 can be used as a diagnostic basis for confirmed cases[6].

125 However, the insistency of viral nucleic acid tests and CT scan results triggered  
126 controversy. This article analyzes the epidemic history, nucleic acid testing results,  
127 and CT images of 7 confirmed cases admitted to our hospital, and discusses the  
128 changes in nucleic acid tests and CT images as the disease proceeds, in order to  
129 provide scientific basis for screening, early diagnosis and dynamic assessment of the  
130 disease.

131

## 132 **2. Methods**

### 133 **2.1 Study design and participants**

134 This was a retrospective analysis study of the clinical features of 7 patients with  
135 COVID-19 who were confirmed COVID-19 pneumonia in the third affiliated hospital  
136 of Sun Yat-sen university Yuedong hospital, from January 2020 to February 2020.  
137 Covid-19 patients were diagnosed and defined the degree of severity on the basis of  
138 the Diagnosis and Treatment of COVID-19 pneumonia (Trial Edition 7). This study  
139 was approved by the Ethics Committee of the third affiliated hospital of Sun Yat-sen  
140 university Yuedong hospital [2020-01]. Written informed consent was waived owing  
141 to the rapid emergence of this infectious disease.

### 142 **2.2 Virus nucleic acid detection**

143 Virus nucleic acid detection was performed by RT-PCR (BIOER, China and Shanghai  
144 ZJ Bio-Tech, China). The samples were pharyngeal swabs and fecal specimens of  
145 patients, detecting the RNA-dependent RNA polymerase, nucleocapsid protein (N)  
146 gene and envelope protein (E) gene of SARS-CoV-2. The test results were classified

147 as negative and positive.

### 148 **2.3 CT scan**

149 All CT images were obtained with patients in the supine position and scanned from  
150 the level of the upper thoracic inlet to the inferior level of the intercostal angle using a  
151 Brilliance 16-slice CT (Philips, The Netherlands). The imaging results were  
152 interpreted and reviewed by 2 attending or higher-level radiologists.

153

## 154 **3. Results**

### 155 **3.1 Epidemiology**

156 The patients were 7 newly confirmed cases of COVID-19 pneumonia by the  
157 pharyngeal swab nucleic acid test from January 25 to February 6, 2020 in the Third  
158 Affiliated Hospital of Sun Yat-sen University Yuedong Hospital, and 5 were  
159 discharged from hospital on February 23, 2020, and the other 2 cases are still  
160 hospitalized. All cases were named as case plus number for convenience, such as case  
161 1. Among them, Cases 1, 3, 4, 5 and 7 are returnees from Wuhan city, Hubei Province.  
162 Cases 2 and 6 are close contacts of confirmed cases. Case 2 is a colleague of a  
163 confirmed patient from other hospital, and Case 6 is the mother of Case 4. The  
164 demographics of patients is shown in Table 1.

### 165 **3.2 Clinical Manifestation**

166 All patients had respiratory symptoms, mainly cough and pharynx discomfort,  
167 throughout the course of the disease, accompanied by fever in 3 patients and limb  
168 weakness in 6 patients. Abdominal pain, diarrhea and other gastrointestinal symptoms  
169 were also observed in 3 patients. The clinical symptoms of all cases are shown in  
170 Table 2.

### 171 **3.3 The results of virus nucleic acid detection**

172 Virus nucleic acid test results are shown in Table 3. All cases were viral nucleic

173 acid-positive in pharyngeal swabs after admission, and subsequently turned negative.  
174 However, Cases 1, 2 and 6 were positive again for viral nucleic acid tests on Day 12,  
175 9 and 12 after the onset of symptoms, respectively, of which Case 6 was positive  
176 again after being negative for 3 consecutive times. Moreover, Case 5 remained  
177 positive for the pharyngeal swab virus nucleic acid test during the first 20 days after  
178 the onset of symptoms. Besides, we got positive results in faeces of 4 patients (Cases  
179 1, 3, 4 and 6) while no positive results were detected in faeces of the other 3 patients  
180 (Cases 2, 5 and 7). The viral nucleic acid test by faeces of Case 6 was positive again  
181 after 4 consecutive negatives. Case 4 remained positive for faeces virus nucleic acid  
182 test during the first 22 days after the onset of symptoms.

### 183 **3.4 The results of CT examination**

184 Lung CT images revealed the evidence of pneumonia in all 7 cases (Table 4 and  
185 Figure 1). Except for Case 7, whose lower lobe of right lung was only involved. all  
186 patients had bilateral lung involvement. Five cases (Cases 1,2,3,4,6) showed  
187 peripheral distribution, while the other 2 cases showed diffused pulmonary  
188 abnormality. The majority of patients had characteristic ground-glass opacity (GGO)  
189 in CT images of the lungs and a few patients showed thickened blood vessel (case 6)  
190 and interstitial tissue (case 5). No pulmonary consolidation or cystic changes was  
191 observed.

192 On the 7<sup>th</sup> day, a chest CT examination of Case 1 was conducted in our hospital, which  
193 showed obvious lung marking changes, and multiple patchy shadows under the pleura  
194 in the lower lobe of the lungs (Figure 1-1a). The result got worse on day 10 (Figure  
195 1-1b) until it became better again on day 20 (Figure 1-1c). CT image showed that Case  
196 2 had multiple patchy shadows with increased density and fuzzy margin scattered in  
197 the left lung on day 4, which were mainly distributed in superior lobe of left  
198 lung (Figure 1-2a to 2c), and later slowly disappeared. CT images of Case 3 and Case  
199 4 (Figure 1-3a to 4c) were similar, which started with multiple patchy slightly  
200 high-density shadows, and later absorbed on day 14 and day 6, respectively. In  
201 addition, we found that Case 5 (Figure 1-5a to 5c) demonstrated fluctuating lung CT



202 images, which showed earlier alleviated and later aggravated manifestation. Case 6  
203 (Figure 1-6a to 6c) showed GGO with fuzzy margin in the lower lobe of both lungs,  
204 with focus of infection near the pleura and thicken blood vessels nearby. Case 7  
205 (Figure 1-7a to 7c) showed a slight increase in the markings of both lungs, and GGO  
206 were seen in the outer basal and posterior basal segments of the lower lobe of right  
207 lung.

208

#### 209 **4. Discussion**

210 The current pathogenic detection methods of COVID-19 mainly include fluorescent  
211 RT-PCR detection of virus nucleic acid or virus gene sequencing. The specimens that  
212 can be collected include pharyngeal secretions, sputum, bronchial veolar lavage fluid,  
213 blood, faeces, urine, etc. Test methods, specimens, test reagents, and test operations  
214 are all factors that may affect the results. Our hospital uses fluorescent RT-PCR to  
215 detect virus nucleic acid. The specimens are mainly pharyngeal swab and faeces. For  
216 the seven confirmed cases in our hospital, virus nucleic acid test results mainly  
217 showed that the pharyngeal swab virus nucleic acid test results were positive in early  
218 stage after the onset of symptoms, and then turned negative , while the faeces test  
219 results were persistently positive in the middle of clinical treatment and recovery  
220 stage. Among them, the pharyngeal swab test result of case 6 returned positive again  
221 after being negative for 3 consecutive times, and faeces specimens test result returned  
222 to positive for being negative for 4 consecutive times, which indicates that the test  
223 result may be related to the amount of virus in the body, the sensitivity of the test kit,  
224 and the repeated illness of COVID-19. This situation was consistent with what was  
225 reported in the press conference of the government in Guangdong Province where  
226 14% of discharged patients were "Recurrence". The faeces test results of Case 4 and  
227 the pharyngeal swab test results of Case 5 remained positive for virus nucleic acid test  
228 even on day 20. Studies have found that there is a strong binding affinity between the  
229 S protein of SARS-CoV-2 and the human angiotensin receptor 2 (ACE2)[7]. ACE2 is

230 also highly expressed in the absorptive epithelial cells of the colon and ileum,  
231 indicating that the digestive system is a potential route of infection[8],and the  
232 possibility of gastrointestinal transmission in case 4 is not ruled out. Moreover,  
233 Chinese scientists have isolated the virus from the feces, the damaged mucous  
234 membranes and bleeding of the gastrointestinal tract, suggesting that more attention  
235 should be paid to preventing fecal-oral transmission[2].

236 The visual findings from COVID-19 cadaver studies are consistent with the  
237 distribution of imaging changes, considering that the GGO images seen in imaging  
238 are corresponding to the lung lesions seen in visual findings[9]. CT scan has the  
239 advantage of high image resolution, and the early lung CT manifestations of  
240 COVID-19 have certain characteristics, which plays a very important role in early  
241 diagnosis and treatment of COVID-19[10]. According to the scope and type of the  
242 lesion, the lung CT manifestation is divided as early, advanced, severe and critical,  
243 and recovery stages[11]. Confirmed cases in our hospital include image changes in the  
244 early, advanced and recovery phases. Until the end of February 23, CT changes were  
245 seen in both lungs of 6 cases among the 7 confirmed cases, the basal segment of the  
246 lower lung lobe in 5 cases was involved, 5 cases showed GGO, and 1 case had  
247 thickened blood vessels and thickened interstitial tissue. No pulmonary consolidation  
248 occurred in these 7 cases.

249 Combined results of nucleic acid test and CT imaging among the 7 confirmed patients  
250 indicate that the 2 detection methods are comparable. Both detections were positive in  
251 6 cases. Nucleic acid tests were negative and CT changes were positive in 1 case, and  
252 nucleic acids were positive after re-examination. No case with both negative by the 2  
253 methods was observed, and the case with positive nucleic acids and negative CT  
254 changes was not found. In general, the positive results of the pharyngeal swab tests  
255 came earlier than the CT image indicating pneumonia alleviation. Studies have found  
256 that CT imaging changes in the lungs are more sensitive to the detection of  
257 COVID-19 than pharyngeal swab viral nucleic acid tests[12].

258 Through comparison, it was found that virus nucleic acid test and CT examination

259 each have their own sensitivity. Based on the gold standard for viral pathogen  
260 detection, CT imaging changes in the lungs are carried out to a certain extent in the  
261 prevention and control of suspected patients and the monitoring of disease progress.  
262 As one of the designated hospitals in Guangdong Province and one of the key  
263 hospitals for fever diagnosis, our hospital performs viral nucleic acid detection and  
264 lung CT at the same time during the prevention and control of the coronavirus  
265 outbreak. In the early phase, faeces viral nucleic acid tests were also conducted  
266 besides pharyngeal swab tests for viral nucleic acid detection, actively investigating  
267 suspicious patients in our hospital from various aspects to reduce the risk of  
268 nosocomial infections.

269

## 270 **5. Conclusion**

271 In the diagnosis of COVID-19, viral nucleic acid test is used as the pathogenic  
272 evidence. With unknown nucleic acid test result and obvious symptoms and signs, the  
273 lung CT examination can be used as assistance to diagnosis so as to reduce missed  
274 diagnosis and misdiagnosis. In confirmed patients, CT changes in the lungs can assist  
275 in disease assessment. For patient discharge, fecal nucleic acid test can be used to  
276 prevent the patients with negative throat swab viral nucleic acid and positive fecal  
277 nucleic acid from recrudescence or becoming potential infectious sources.

278

## 279 **Funding**

280 No fund.

## 281 **Conflict of interest**

282 The authors declare no conflict of interest in the manuscript.

## 283 **Availability of data and materials**

284 The datasets used and/or analyzed during the current study are available from the

285 corresponding author on reasonable request.

## 286 **Ethical approval**

287 This study was approved by the Ethics Committee of the third affiliated hospital of  
288 Sun Yat-sen university Yuedong hospital [2020-01]. Written informed consent was  
289 waived owing to the rapid emergence of this infectious disease.

290

291

## 292 **References**

293 [1]National Health Commission of the People's Republic of China. Diagnosis and  
294 Treatment of COVID-19pneumonia (Trial Seven Edition, 03 March 2020)  
295 <http://www.nhc.gov.cn/>.

296 [2]Guan WJ, Ni ZY, Hu Y, et al. Clinical Characteristics of Coronavirus Disease 2019  
297 in China. N Engl J Med. 2020. [Accessed 11 April 2020]  
298 DOI:10.1056/NEJMoa2002032.

299 [3] WHO. Director-General's opening remarks at the media briefing on  
300 COVID-19-6-march-2020.<https://www.who.int/dg/speeches/detail/>.

301 [4] Shi H, Han X, Jiang N, et al. Radiological findings from 81 patients with  
302 COVID-19 pneumonia in Wuhan, China: a descriptive study. Lancet Infect Dis.  
303 2020; 20(4):425-434.

304 [5] General Office of National Health Committee. Office of State Administration of  
305 Traditional Chinese Medicine. Notice on the issuance of a program for the  
306 diagnosis and treatment of novel coronavirus (2019-nCoV) infected pneumonia  
307 (trial sixth edition, 19 February2020)

- 308 [6] Chinese Society of Radiology. Radiological diagnosis of new coronavirus infected  
309 pneumonitis: Expert recommendation from the Chinese Society of Radiology  
310 (First edition). Chin J Radial, 2020,54(00): E001-E001.DOI:  
311 10.3760/cma.j.issn.1005-1201.2020.0001.
- 312 [7] XU X, CHEN P, WANG J, et al. Evolution of the novel coronavirus from the  
313 ongoing Wuhan outbreak and modeling of its spike protein for risk of human  
314 transmission. J. SCIENCE CHINA-LIFE SCIENCES,2020;63(3):457-460.
- 315 [8] ZHANG H, KANG Z, GONG H, et al. The digestive system is a potential route of  
316 2019-nCoV infection: A bioinformatics analysis based on single-cell  
317 transcriptomes. J. Biorxiv, 2020. [Accessed 31 January 2020]  
318 <https://doi.org/10.1101/2020.01.30.927806>
- 319 [9] Liu Q, Wang RX, Qu GQ, et al. A report on the systematic autopsy of a novel  
320 coronavirus pneumonia. Journal of Forensic Medicine. 2020;36(1):21-23. (in  
321 Chinese)
- 322 [10] Wang K, Kang SR, Tian RH, et al. Analysis of chest CT imaging features of  
323 novel coronavirus pneumonia. J. Chinese Journal of Clinical Medicine.  
324 2020;27(01):27-31. (in Chinese)
- 325 [11] Chinese Society of Radiology. Radiological diagnosis of new coronavirus  
326 infected pneumonitis: Expert recommendation from the Chinese Society of  
327 Radiology (First edition). Chin J Radiol, 2020,54(00): E001-E001. DOI:  
328 10.3760/cma.j.issn.1005-1201.2020.0001
- 329 [12] Jin YH, Chen B, Zhang YF, et al. The value of CT imaging of lung in the

330 prevention and control of new coronavirus pneumonia. J. Modern Practical

331 Medicine.2020;32(02):141-144. (in Chinese)

332

**Table 1. Demographics of confirmed cases of COVID-19**

| <b>Basic characteristics</b>              | <b>N ( % )</b> |
|-------------------------------------------|----------------|
| <b>Age</b>                                |                |
| 0 ~                                       | 0 ( 0 )        |
| 20 ~                                      | 3 ( 42.9% )    |
| 40 ~                                      | 3 ( 42.9% )    |
| 60 ~                                      | 1 ( 14.2% )    |
| ≥80                                       | 0 ( 0 )        |
| <b>Sex</b>                                |                |
| Male                                      | 3 ( 42.9% )    |
| Female                                    | 4 ( 57.1% )    |
| <b>Habitual residence</b>                 |                |
| Hubei Province                            | 5 ( 71.4% )    |
| Guangdong Province                        | 2 ( 28.6% )    |
| <b>Contact with people from<br/>Wuhan</b> |                |
| Positive                                  | 4 ( 42.9% )    |
| Negative                                  | 3 ( 57.1% )    |

333

334

335

336

337

338

339

340

341

342

343

344

345

**Table 2. Clinical features of patients with COVID-19**

| <b>Clinical features</b> | <b>N ( % )</b> |
|--------------------------|----------------|
| <b>Type of case</b>      |                |
| Mild                     | 0 ( 0 )        |
| Common                   | 6 ( 85.7% )    |
| Severe                   | 1 ( 14.3% )    |
| Critical                 | 0 ( 0 )        |
| <b>Fever</b>             |                |
| Positive                 | 3 ( 42.9% )    |
| Negative                 | 4 ( 57.1% )    |
| <b>Nasal Obstruction</b> |                |
| Positive                 | 4 ( 57.1% )    |
| Negative                 | 3 ( 42.9% )    |
| <b>Catarrh</b>           |                |
| Positive                 | 1 ( 14.3% )    |

|                         |             |
|-------------------------|-------------|
| Negative                | 6 ( 85.7% ) |
| <b>Rhinobyon</b>        |             |
| Positive                | 2 ( 28.6% ) |
| Negative                | 5 ( 71.4% ) |
| <b>Productive Cough</b> |             |
| Positive                | 2 ( 28.6% ) |
| Negative                | 5 ( 71.4% ) |
| <b>Dry Cough</b>        |             |
| Positive                | 5 ( 71.4% ) |
| Negative                | 2 ( 28.6% ) |
| <b>Chest distress</b>   |             |
| Positive                | 3 ( 42.9% ) |
| Negative                | 4 ( 57.1% ) |
| <b>Polypnea</b>         |             |
| Positive                | 2 ( 28.6% ) |
| Negative                | 5 ( 71.4% ) |
| <b>Limb weakness</b>    |             |
| Positive                | 6 ( 85.7% ) |
| Negative                | 1 ( 14.3% ) |
| <b>Diarrhea</b>         |             |
| Positive                | 3 ( 42.9% ) |
| Negative                | 4 ( 57.1% ) |
| <b>Stomachache</b>      |             |
| Positive                | 2 ( 28.6% ) |
| Negative                | 5 ( 71.4% ) |

---



347

**Table 3. Viral nucleic acid test results of COVID-19 cases**

| Case number | Sample type | Day |   |   |   |   |   |   |   |   |    |    |    |    |    |    |    |    |    |    |    |    |    |    |
|-------------|-------------|-----|---|---|---|---|---|---|---|---|----|----|----|----|----|----|----|----|----|----|----|----|----|----|
|             |             | 1   | 2 | 3 | 4 | 5 | 6 | 7 | 8 | 9 | 10 | 11 | 12 | 13 | 14 | 15 | 16 | 17 | 18 | 19 | 20 | 21 | 22 | 23 |
| 1           | Throat swab |     |   |   |   |   |   | + | - |   |    |    | +  | -  | -  | -  |    |    |    |    |    |    |    | -  |
|             | Faeces      |     |   |   |   |   |   |   |   |   |    |    |    |    |    | +  | +  | -  |    | -  |    |    |    | -  |
| 2           | Throat swab |     |   |   | + |   | - |   |   | + | -  |    |    |    |    |    |    | -  | -  |    |    |    |    |    |
|             | Faeces      |     |   |   |   |   |   |   |   |   |    | -  | -  |    |    |    |    | -  | -  |    |    |    |    |    |
| 3           | Throat swab |     |   |   |   |   |   |   | + | - |    |    | -  |    |    | -  |    | -  |    |    |    | -  |    | -  |
|             | Faeces      |     |   |   |   |   |   |   |   | - |    |    | -  |    |    | +  |    | -  |    |    |    |    |    | -  |
| 4           | Throat swab | +   | - |   |   | - | - | - |   | - | -  | -  |    | -  |    | -  |    | -  |    |    | -  | -  |    |    |
|             | Faeces      |     | + |   |   | + | + | + |   | + | +  | +  |    | +  |    | +  |    | +  |    | +  | +  |    | +  | +  |
| 5           | Throat swab |     |   |   | + | + | + |   | + |   | +  |    | +  |    | +  |    | +  |    | +  |    | +  | -  | -  | -  |
|             | Faeces      |     |   |   |   | - | - |   | - |   | -  |    | -  |    | -  |    | -  |    |    |    | -  |    |    | -  |
| 6           | Throat swab |     | + | + | - |   | - |   | - |   |    |    | +  |    | -  |    | -  |    | -  |    | -  |    |    |    |
|             | Faeces      |     |   | + | - |   | - |   | - |   |    |    |    |    | -  |    |    |    | +  |    | -  |    | -  |    |
| 7           | Throat swab |     | + | + | - |   | - | - |   |   |    |    |    |    |    |    |    |    |    |    |    |    |    |    |
|             | Faeces      |     |   | - |   | - | - |   |   |   |    |    |    |    |    |    |    |    |    |    |    |    |    |    |

Results "+" presents positive result, "-" presents negative result; "Day" counts when symptoms appear.

348

349

350

351

352

353

354

355

356

**Table 4. Imaging changes of CT examination of COVID-19 cases**

| Case Number | Location of Lesions                                    | Type of Lesions |               |                         |                                |
|-------------|--------------------------------------------------------|-----------------|---------------|-------------------------|--------------------------------|
|             |                                                        | GGO             | Consolidation | Blood Vessel Thickening | Interstitial Tissue Thickening |
| 1           | Lower lobes of both lungs                              | -               | -             | -                       | -                              |
| 2           | Upper lobe of left lung;<br>Lower lobes of both lungs  | +               | -             | -                       | -                              |
| 3           | Lower lobe of both lungs                               | +               | -             | -                       | -                              |
| 4           | Upper lobe of right lung;<br>Lower lobes of both lungs | -               | -             | -                       | -                              |
| 5           | Upper lobe of left lung;<br>Lower lobes of right lungs | +               | -             | -                       | +                              |
| 6           | Lower lobe of both lungs                               | +               | -             | +                       | -                              |
| 7           | Lower lobe of right lungs                              | +               | -             | -                       | -                              |

357

358

359

360

361

362

363

364

365

366

367

368

369 **Figure 1. Pulmonary CT images of confirmed cases of COVID-19.** The pulmonary  
370 CT scan was conducted from the upper level of thoracic inlet to the inferior level of  
371 the costophrenic angle with all 7 confirmed patients in the supine position.  
372 Representative pictures were presented out of all pictures from every pulmonary  
373 cross-section in each patient.

Case 1

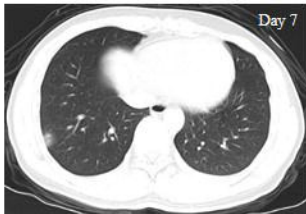

1a

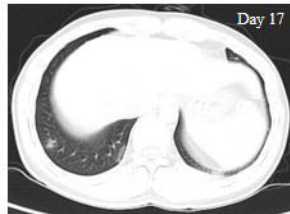

1b

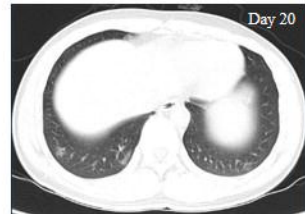

1c

Case 2

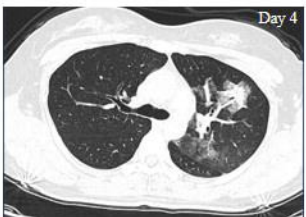

2a

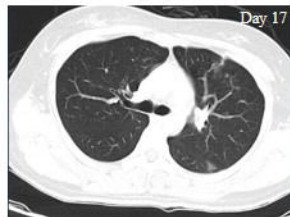

2b

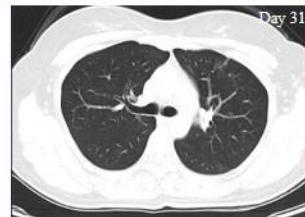

2c

Case 3

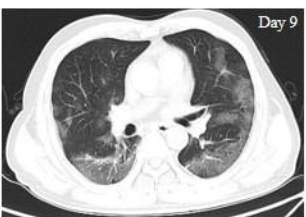

3a

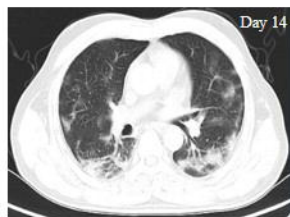

3b

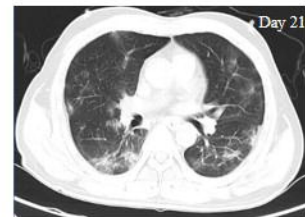

3c

Case 4

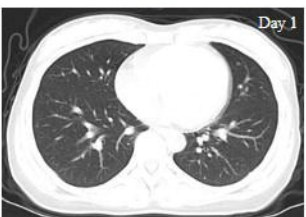

4a

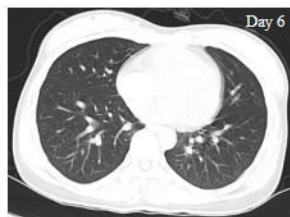

4b

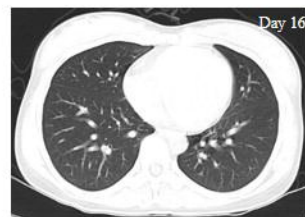

4c

Case 5

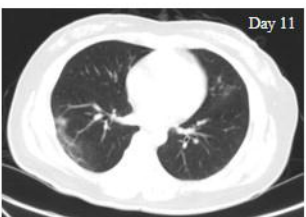

5a

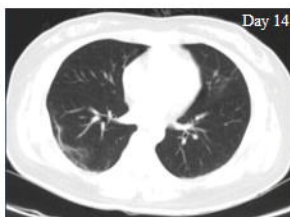

5b

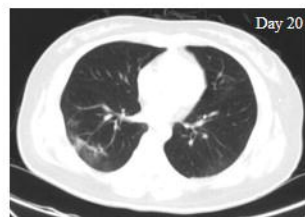

5c

Case 6

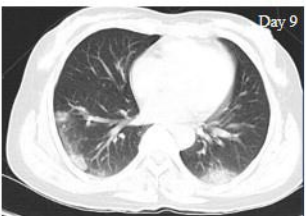

6a

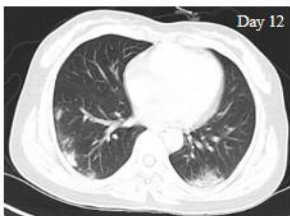

6b

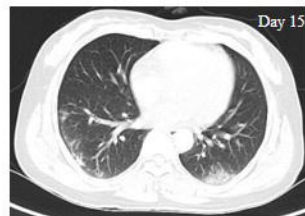

6c

Case 7

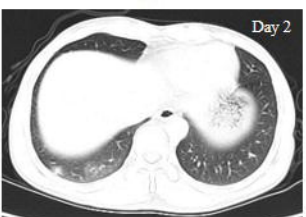

7a

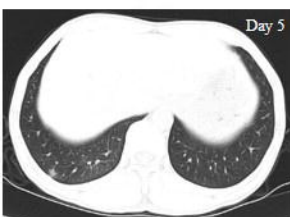

7b

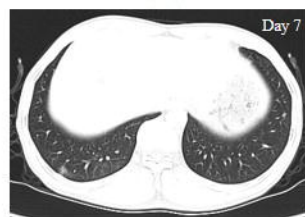

7c
